# Supplementary material for: The differential impact of a 6-versus 12-month pharmacist-led interprofessional medication adherence program on medication adherence in patients with diabetic kidney disease: the randomized PANDIA-IRIS study
Source: PubMed Central journal article supplement (PMC10847300; doi:10.3389/fphar.2024.1294436), 2024-01-24
Supplement: DataSheet1.pdf [file DataSheet1.pdf]

## Supplementary Material 1: GEE formula equations

GEE analysis with antidiabetics:

$$\text{Logit}(\text{Pr}(Z_j)) = 2.3 + 0.001 \cdot T1_j - 0.569 \cdot \text{Jump}_j - 0.0003 \cdot T0_j$$

GEE analysis with antihypertensive drugs:

$$\text{Logit}(\text{Pr}(Z_j)) = 2.5 + 0.004 \cdot T1_j - 0.367 \cdot \text{Jump}_j - 0.002 \cdot T0_j$$

GEE analysis with statins:

$$\text{Logit}(\text{Pr}(Z_j)) = 3.1 + 0.0004 \cdot T1_j - 0.271 \cdot \text{Jump}_j - 0.001 \cdot T0_j$$

$Z_j$  = medication intake at day  $j$  (1=correct / 0=incorrect)

$T1_j$  = Time already spent in intervention at day  $j$  (in days)

$T0_j$  = Time already spent in follow-up at day  $j$  (in days)

$\text{Jump}_j$  = change of phase (from intervention to follow-up) at day  $j$  (1=change / 0=no change)
